# Supplementary material for: Elucidating the Pseudomonas aeruginosa Fatty Acid Degradation Pathway: Identification of Additional Fatty Acyl-CoA Synthetase Homologues
Source: PLoS One. 2013 May 29;8(5):e64554. doi: 10.1371/journal.pone.0064554 (PMC3667196; doi:10.1371/journal.pone.0064554)
Supplement: Table S1 — Potential FadD homologues of P. aeruginosa identified through BLAST and tested for complementation in E. coli fadD−/fadR− (E2011). (DOC) [file pone.0064554.s003.doc]

**Table S1.** Potential FadD homologues of *P. aeruginosa* identified through BLAST and tested for complementation in *E. coli fadD-*/*fadR-* (E2011).

| **Gene** | **Predicted functiona** | **Identity/ Similarity to *E. coli* FadD** | **Length (amino acids residues)b** | **Growth of E2011 on oleatec** | **Growth of E2011 on decanoatec** |
| --- | --- | --- | --- | --- | --- |
| PA0996 | probable coenzyme A ligase | 28%/43% | 517 | - | - |
| PA1617 | probable AMP-binding enzyme | 24%/40% | 555 | +4 | +1 |
| PA1221 | hypothetical protein | 24%/40% | 618 | - | - |
| PA1997 | probable AMP-binding enzyme | 21%/37% | 651 | - | - |
| PA2555 | probable AMP-binding enzyme | 25%/44% | 555 | - | - |
| PA2557 | probable AMP-binding enzyme | 31%/52% | 564 | - | - |
| PA2893 | very long-chain acyl-CoA synthetase | 22%/37% | 608 | +4 | +1 |
| PA3568 | probable acetyl-CoA synthetase | 24%/39% | 628 | - | - |
| PA3860 | probable AMP-binding enzyme | 29%/47% | 632 | +4 | +1 |
| PA3924 | probable medium-chain acyl-CoA ligase | 24%/43% | 560 | +4 | +1 |
| PA4198 | probable AMP-binding enzyme | 26%/43% | 540 | - | - |

a From [www.pseudomonas.com](http://www.pseudomonas.com/)

b *E. coli* FadD is 561 amino acids (aa) long, FadD1 (PA3299, not shown) is 562 aa, and FadD2 (PA3300, not shown) is 562 aa. cGenes were cloned into pUC19 and tested in E2011 (*E. coli fadD-*/*fadR-*) on 1x M9 medium + 1% (w/v) Brij-58 + ampicillin 100 μg/ml + 0.2% (w/v) oleate (C18:1∆9) or decanoate (C10:0) as sole carbon source  +1 is very little growth whereas +6 is very heavy growth comparable to K12 on glucose at day 3.

.
